# Supplementary material for: Genome-Wide Identification and Analysis of MAPK and MAPKK Gene Families in Bread Wheat (Triticum aestivum L.)
Source: Genes (Basel). 2017 Oct 20;8(10):284. doi: 10.3390/genes8100284 (PMC5664134; doi:10.3390/genes8100284)
Supplement: Supplementary file 1 [file genes-08-00284-s001.xlsx]

## Sheet: Table S1
Table S1. The accession number and samples information of RNA-seq datasets used in this study
Abiotic stresses	Accession number	Tissue	Age	Treatment
	SRR2306545	Leaf	1 week	No treatment
	SRR2306546	Leaf	1 week	6 hour of salt stress
	SRR2306549	Leaf	1 week	12 hour of salt stress
	SRR2306550	Leaf	1 week	24 hour of salt stress
	SRR2306552	Leaf	1 week	48 hour of salt stress
	SRR1542405	Leaf	1 week	No treatment
	SRR1542407	Leaf	1 week	1 hour of drought stress
	SRR1542409	Leaf	1 week	6 hour of drought stress
	SRR1542405	Leaf	1 week	No treatment
	SRR1542411	Leaf	1 week	1 hour of heat stress
	SRR1542413	Leaf	1 week	6 hour of heat stress
	SRR1460549	Leaf	2 weeks	23℃ 2 weeks
	SRR1460552	Leaf	4 wesek	4℃ 4 weeks
Different tissues	-	Grain	https://urgi.versailles.inra.fr/files/RNASeqWheat/5_organs_oriented/grain_5.fastq.gz
	-	Leaf	https://urgi.versailles.inra.fr/files/RNASeqWheat/5_organs_oriented/leaves_5.fastq.gz
	-	Root	https://urgi.versailles.inra.fr/files/RNASeqWheat/5_organs_oriented/root_5.fastq.gz
	-	Spike	https://urgi.versailles.inra.fr/files/RNASeqWheat/5_organs_oriented/spike_5.fastq.gz
	-	Stem	https://urgi.versailles.inra.fr/files/RNASeqWheat/5_organs_oriented/stem_5.fastq.gz
